# Supplementary material for: Association between COVID-19 and Male Fertility: Systematic Review and Meta-Analysis of Observational Studies
Source: PubMed Central journal article supplement — World J Mens Health. 2022 Oct 4;41(2):311–29. doi: 10.5534/wjmh.220091 (PMC10042646; doi:10.5534/wjmh.220091), 2022-10-04
Supplement: wjmh-41-311-s001.pdf [file wjmh-41-311-s001.pdf]

**Supplement Table 1.** The Agency for Health Care Research and Quality (AHRQ) statement for cross-sectional study quality assessment

| First author     | Year | Study design    | 1 | 2 | 3 | 4 | 5 | 6 | 7 | 8 | 9 | 10 | 11 | Total scores |
|------------------|------|-----------------|---|---|---|---|---|---|---|---|---|----|----|--------------|
| Temiz [20]       | 2021 | Cross-sectional | 1 | 1 | 1 | 1 | 1 | 1 | 1 | 1 | 1 | 1  | 0  | 10           |
| Holtmann [21]    | 2020 | Cohort          | 1 | 1 | 1 | 1 | 1 | 1 | 1 | 1 | 1 | 1  | 0  | 10           |
| Li [22]          | 2020 | Cross-sectional | 1 | 1 | 1 | 1 | 1 | 1 | 1 | 1 | 1 | 1  | 0  | 9            |
| Rafiee [23]      | 2021 | Cohort          | 1 | 1 | 1 | 1 | 1 | 1 | 1 | 0 | 1 | 1  | 1  | 10           |
| Pazir [24]       | 2021 | Cohort          | 1 | 1 | 1 | 1 | 1 | 1 | 1 | 1 | 0 | 1  | 1  | 11           |
| Gul [25]         | 2021 | Cross-sectional | 1 | 1 | 1 | 1 | 1 | 1 | 1 | 1 | 0 | 1  | 0  | 9            |
| Koç [26]         | 2021 | Cohort          | 1 | 1 | 1 | 1 | 1 | 1 | 1 | 1 | 0 | 1  | 1  | 10           |
| Ma [27]          | 2021 | Cross-sectional | 1 | 1 | 1 | 1 | 1 | 1 | 1 | 1 | 0 | 1  | 0  | 9            |
| Ruan [13]        | 2021 | Cross-sectional | 1 | 1 | 1 | 1 | 1 | 1 | 1 | 0 | 1 | 1  | 0  | 9            |
| Erbay [29]       | 2021 | Cross-sectional | 1 | 1 | 1 | 1 | 1 | 1 | 1 | 1 | 0 | 1  | 1  | 10           |
| Xu [30]          | 2021 | Cross-sectional | 1 | 1 | 1 | 1 | 1 | 1 | 1 | 0 | 0 | 1  | 0  | 8            |
| Karkin [31]      | 2021 | Cross-sectional | 1 | 1 | 1 | 1 | 1 | 1 | 1 | 1 | 0 | 1  | 0  | 9            |
| Okçelik [32]     | 2021 | Cross-sectional | 1 | 1 | 1 | 1 | 1 | 1 | 0 | 1 | 0 | 1  | 0  | 8            |
| Salonia [33]     | 2021 | Cohort          | 1 | 1 | 1 | 1 | 1 | 1 | 1 | 1 | 1 | 1  | 0  | 10           |
| Cinislioglu [35] | 2022 | Cohort          | 1 | 1 | 1 | 1 | 1 | 1 | 1 | 1 | 0 | 1  | 0  | 10           |

1: Define the source of information (survey, record review)?

2: List inclusion and exclusion criteria for exposed and unexposed subjects (cases and controls) or refer to previous publications?

3: Indicate time period used for identifying patients?

4: Indicate whether or not subjects were consecutive if not population-based?

5: Indicate if evaluators of subjective components of study were masked to other aspects of the status of the participants?

6: Describe any assessments undertaken for quality assurance purposes (e.g., test/retest of primary outcome measurements)?

7: Explain any patient exclusions from analysis?

8: Describe how confounding was assessed and/or controlled?

9: If applicable, explain how missing data were handle in the analysis?

10: Summarize patient response rates and completeness of data collection?

11: Clarify what follow-up, if any, was expected and percentage of patients for which incomplete data or follow-up was obtained
