# Supplementary material for: Association between COVID-19 and Male Fertility: Systematic Review and Meta-Analysis of Observational Studies
Source: PubMed Central journal article supplement — World J Mens Health. 2022 Oct 4;41(2):311–29. doi: 10.5534/wjmh.220091 (PMC10042646; doi:10.5534/wjmh.220091), 2022-10-04
Supplement: wjmh-41-311-s002.pdf [file wjmh-41-311-s002.pdf]

Supplement Table 2. Newcastle–Ottawa Scale scores for literature quality assessment

| First author | Year | Country | Study design       | Selection                   |                             |                       | Comparability          |                                   | Exposure                  |                              | Total scores |
|--------------|------|---------|--------------------|-----------------------------|-----------------------------|-----------------------|------------------------|-----------------------------------|---------------------------|------------------------------|--------------|
|              |      |         |                    | Adequacy of case definition | Representativeness of cases | Selection of controls | Definition of controls | Control for important of exposure | Ascertainment of exposure | Same method of ascertainment |              |
| Guo [28]     | 2021 | China   | Case-control study | 1                           | 1                           | 1                     | 1                      | 1                                 | 1                         | 1                            | 8            |
| Saad [34]    | 2021 | China   | Case-control study | 1                           | 1                           | 0                     | 1                      | 1                                 | 1                         | 1                            | 7            |
